# Supplementary material
Source: PubMed Central journal article supplement (PMC3288357)
Supplement: NIHMS324802-supplement-1.pdf [file NIHMS324802-supplement-1.pdf]

## Supplemental Figure Legends

**sFig. 1. pshA20-LMP1/2 nucleofection of hDC.** **A.** hDCs were nucleofected with pmaxGFP. The nucleofection efficiency was determined by analyses of GFP expression. **B.** hDCs was nucleofected with pshA20-LMP1/2. The nucleofection efficiency was determined by ICS analysis of intracellular LMP1 expression. The data are representative of two independent experiments.  $P < 0.01$ , pshuttle vs. pmaxGFP or pshA20-LMP1/2 nucleofection.

**sFig. 2. A20 expression in unstimulated, differently transfected or Mock hDCs.** hDCs were nucleofected with Mock, pLMP1/2, or pshA20-LMP1/2 followed by LPS stimulation or nonstimulation. A20 mRNA level was analyzed by qPCR and data were normalized with mock DC A20 mRNA 24hr after nucleofection (**upper**). A20 protein expression was analyzed by western blot 24 hrs after nucleofection (**lower**). The data are representative of two independent experiments. The difference of A20 expression by pLMP1/2 DCs or Mock DCs is not statistically significant.

**sFig. 3. IL-10 and TGF- $\beta$  production by human lymphoma.** Tumor cell lysates were prepared from human lymphoma cell lines or PBMC at a concentration of  $10^8$  cells/ml. The IL-10 or TGF- $\beta$  level in the cell lysates was analyzed by ELISA. The data are representative of two independent experiments. \*  $P < 0.05$ , tumor cell lysate vs. PBMC.

**sFig. 4. Impact of Silencing IL-10 on hDC function.** **A.** hDCs were transfected with IL-10 siRNA (siIL-10), IL-10R siRNA (siIL-10R), siA20, or Mock followed by TL treatment. The treated hDC were washed and stimulated with LPS. The supernatants were harvested for ELISA analysis of IL-12 production. **B.** The above siRNA transfected, TL-pulsed hDCs were cocultured with CD4<sup>+</sup> T cells for 7-9 days. IL-10 production by the cocultured CD4<sup>+</sup> T cells was determined by ELISA. \*  $P < 0.05$ , TL/shA20 vs. TL.

**sFig. 5. Frequencies of CD4<sup>+</sup>/CD8<sup>+</sup> T cells in the cocultures.** Autologous HLA-A2<sup>+</sup> lymphocytes were co-cultured with the nucleofected DCs for 2-3 weeks with weekly re-stimulation. Frequencies of CD8<sup>+</sup> T cells or CD4<sup>+</sup> in the cocultures were assessed by CD8/CD4 antibody staining/FACS. The data are representative of the analyzed 2 buffy coats.
