# Supplementary material
Source: PubMed Central journal article supplement (PMC3288357)
Supplement: NIHMS324802-supplement-2.pdf [file NIHMS324802-supplement-2.pdf]

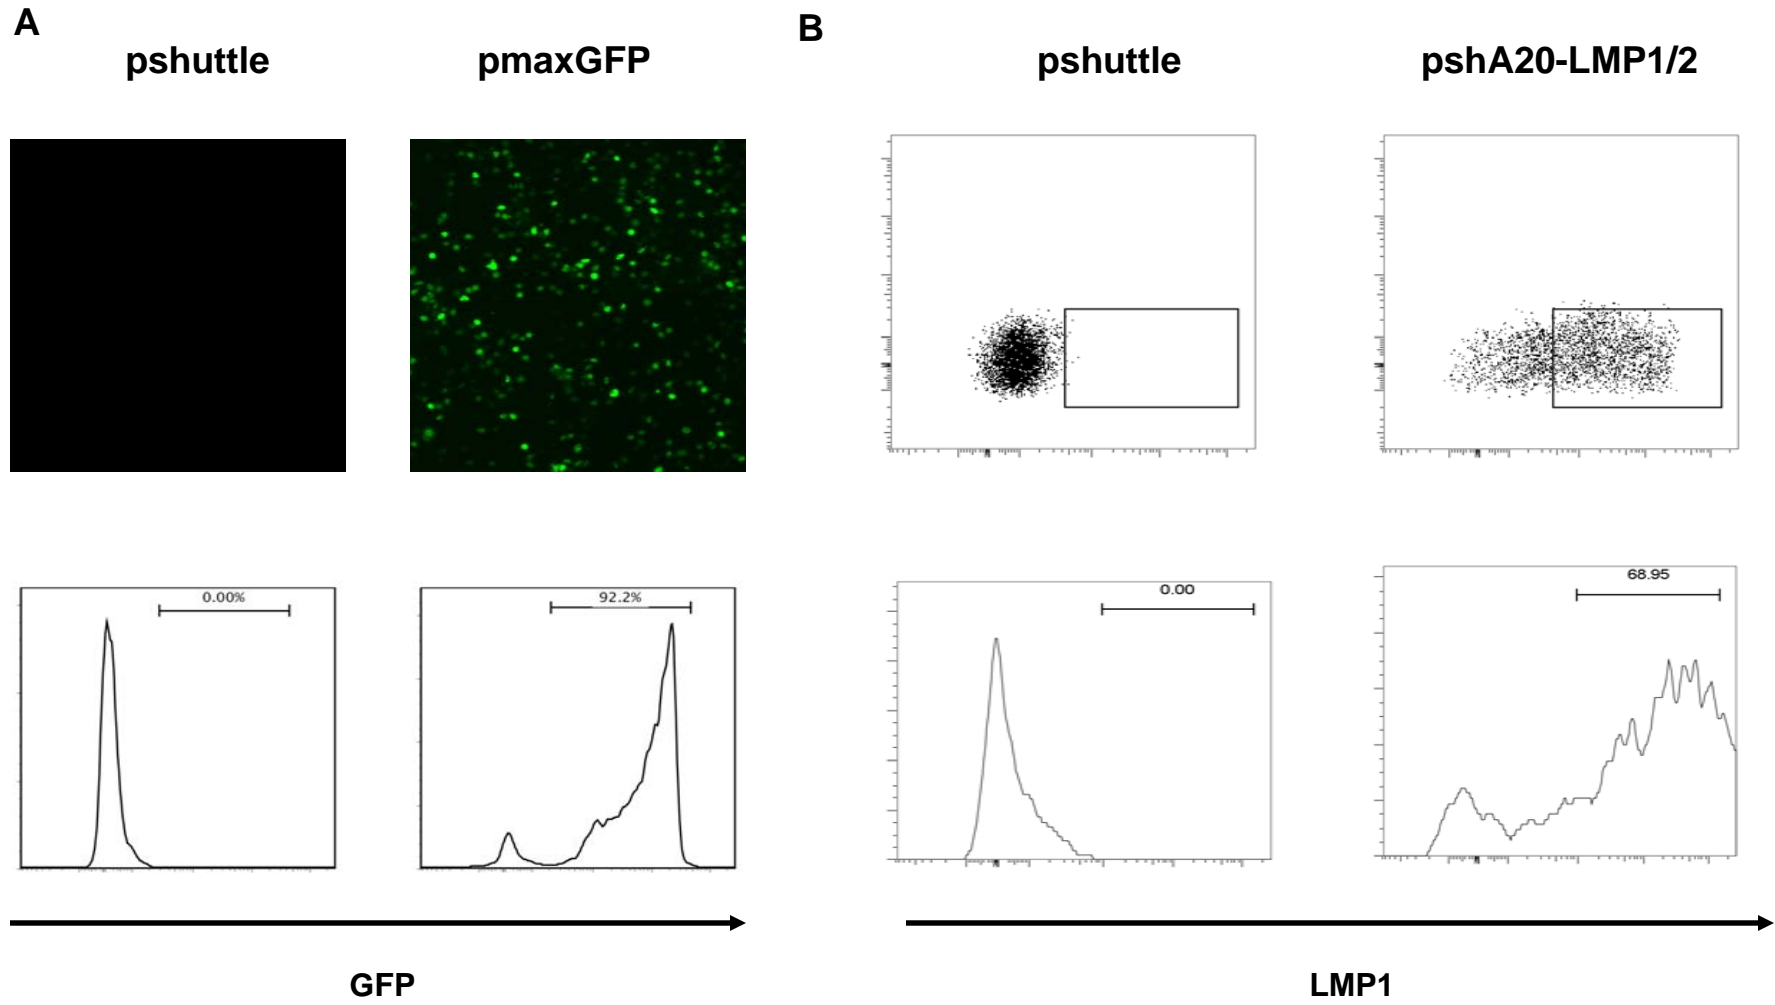

Supplemental Fig. 1. Hong et al.

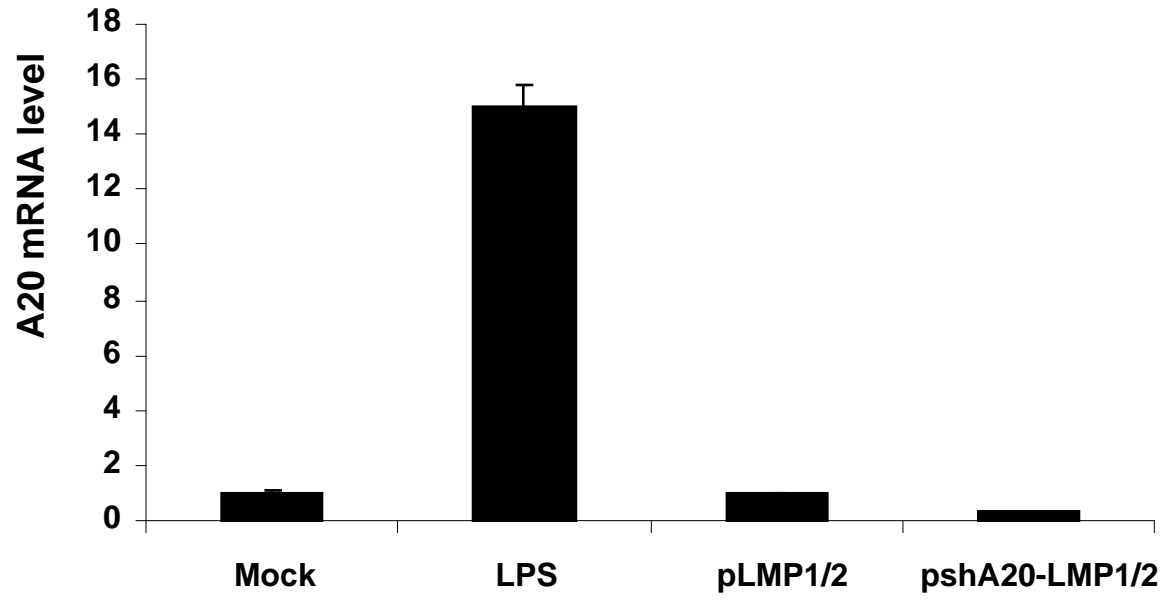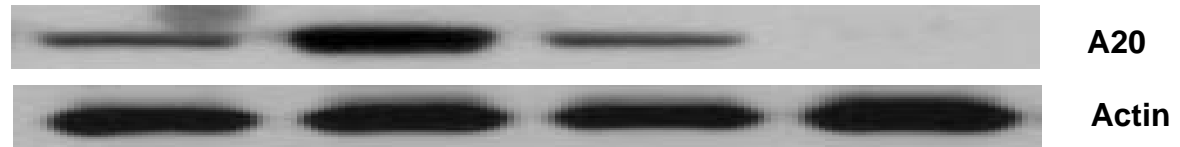

Supplemental Fig. 2, Hong, et al.

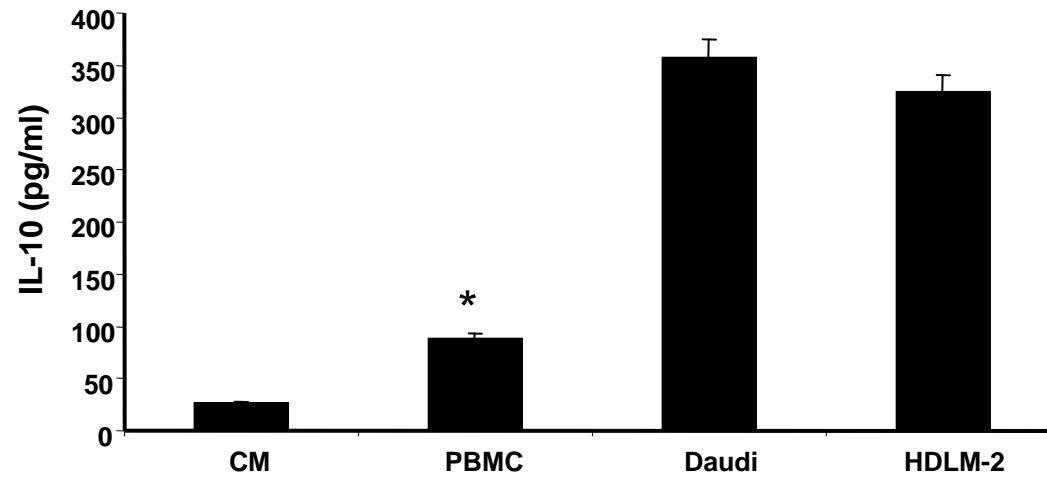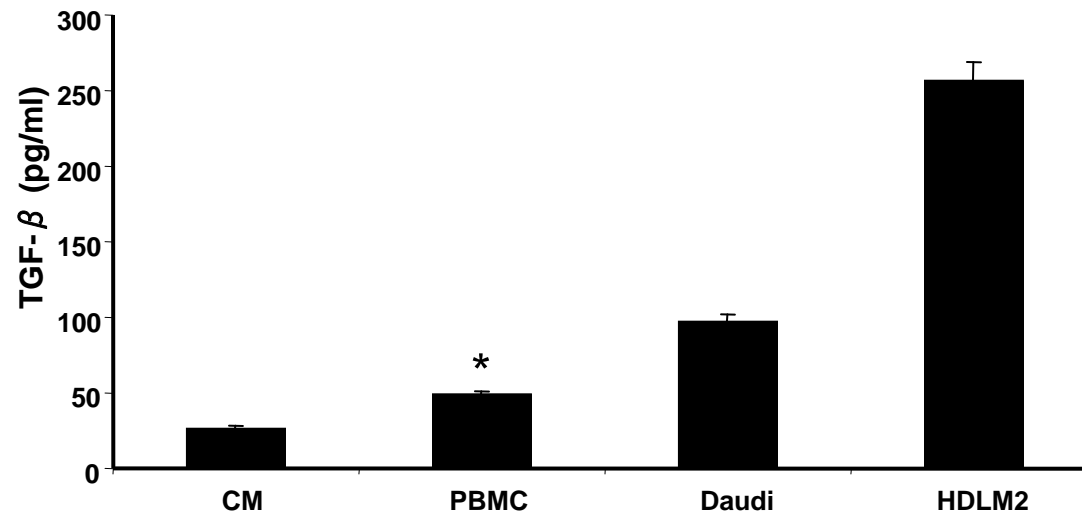

Supplemental Fig. 3, Hong et al.

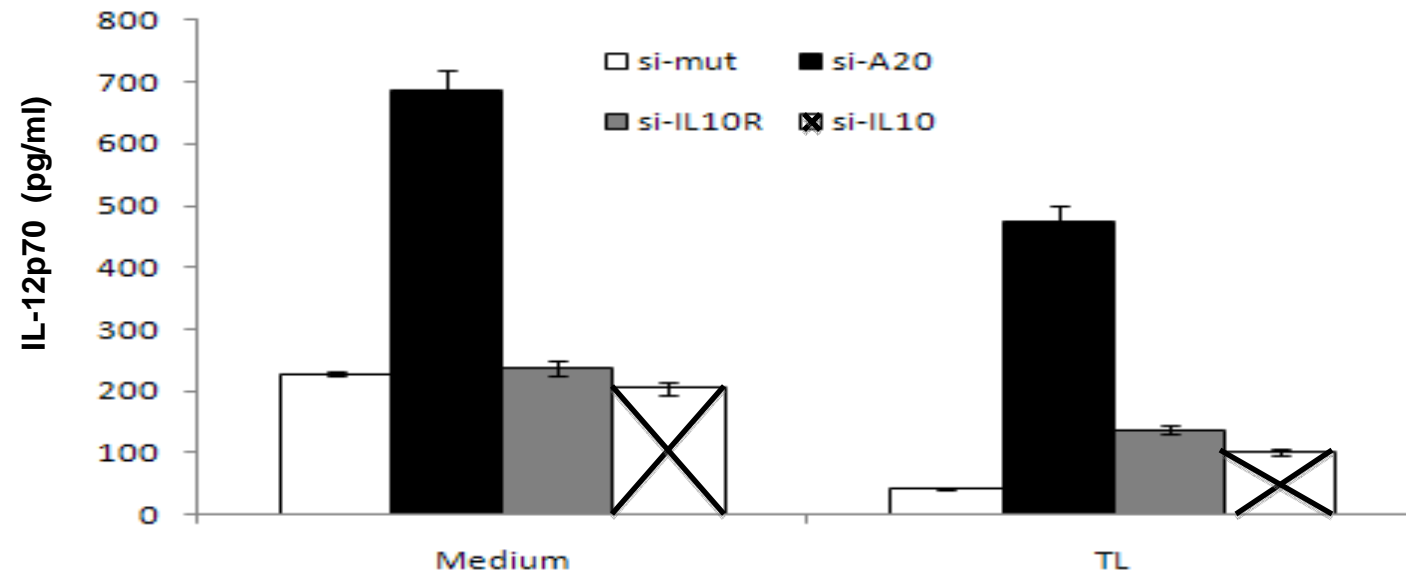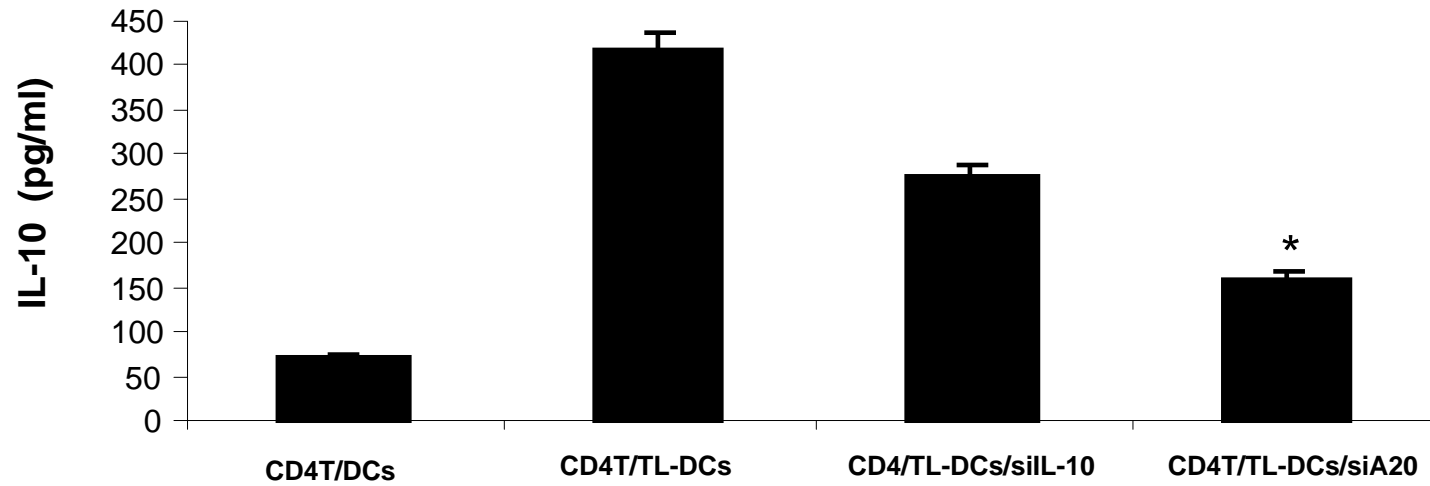

Supplemental Fig.4, Hong, et al.

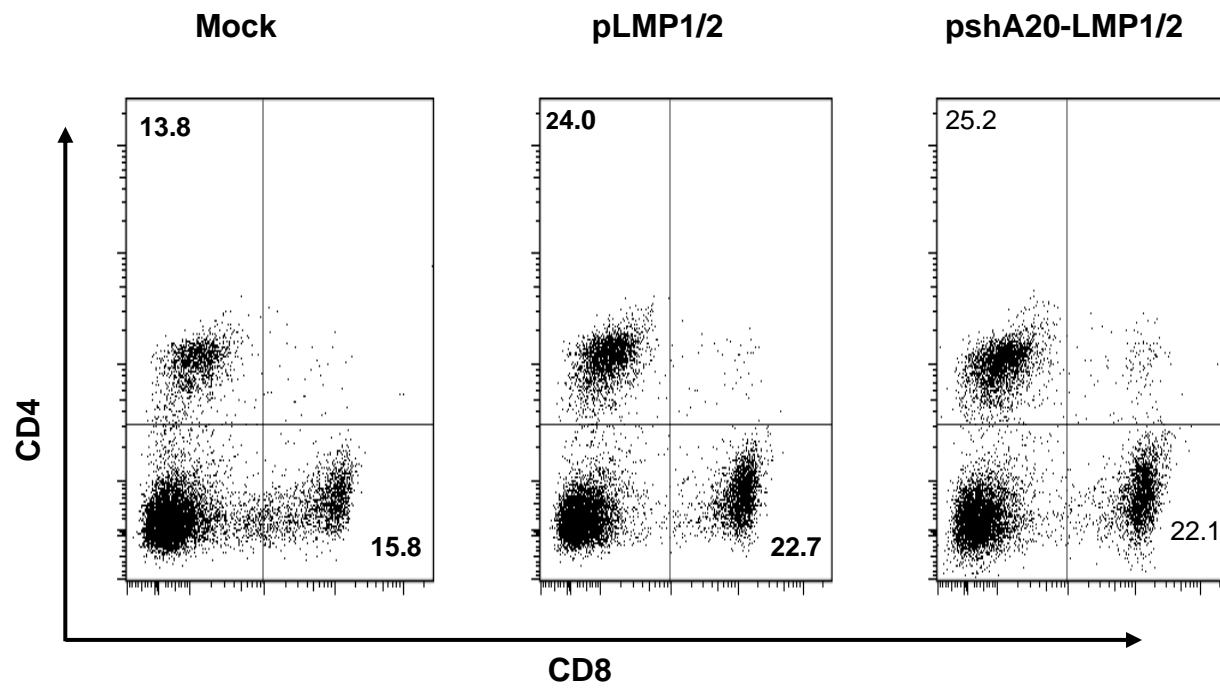

Supplemental Fig.5, Hong, et al.
